# Supplementary material for: Robust free-standing nanomembranes of organic/inorganic interpenetrating networks
Source: Springer Nature journal article supplement (doi:10.1038/nmat1655), 2006-05-21
Supplement: 41563_2006_BFnmat1655_MOESM4_ESM.pdf [file 41563_2006_BFnmat1655_MOESM4_ESM.pdf]

## Supplementary information

**Movie S1:** Manipulation of a 16 cm<sup>2</sup> self-supporting 35 nm thick Hybrid\_1 nanofilm floating in ethanol.

**Movie S2:** Aspiration and release of a 16 cm<sup>2</sup> Hybrid\_1 nanofilm through a micropipette with a tip diameter of 320 μm.

**Movie S3:** Permeation of ethanol through a freely suspended Hybrid\_1 nanofilm (35 nm thick) attached at the bottom of a glass tube.

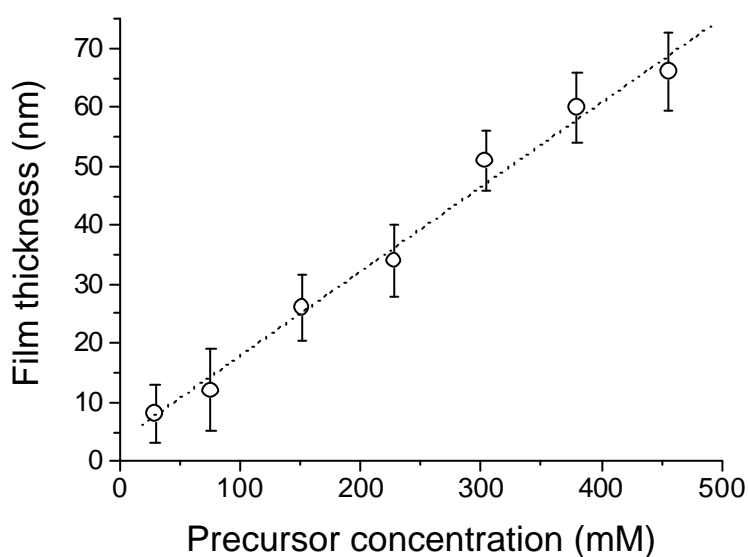

**Figure S1.** Thickness of the free-standing Hybrid\_1 nanofilms as a function of the precursor concentration in chloroform.

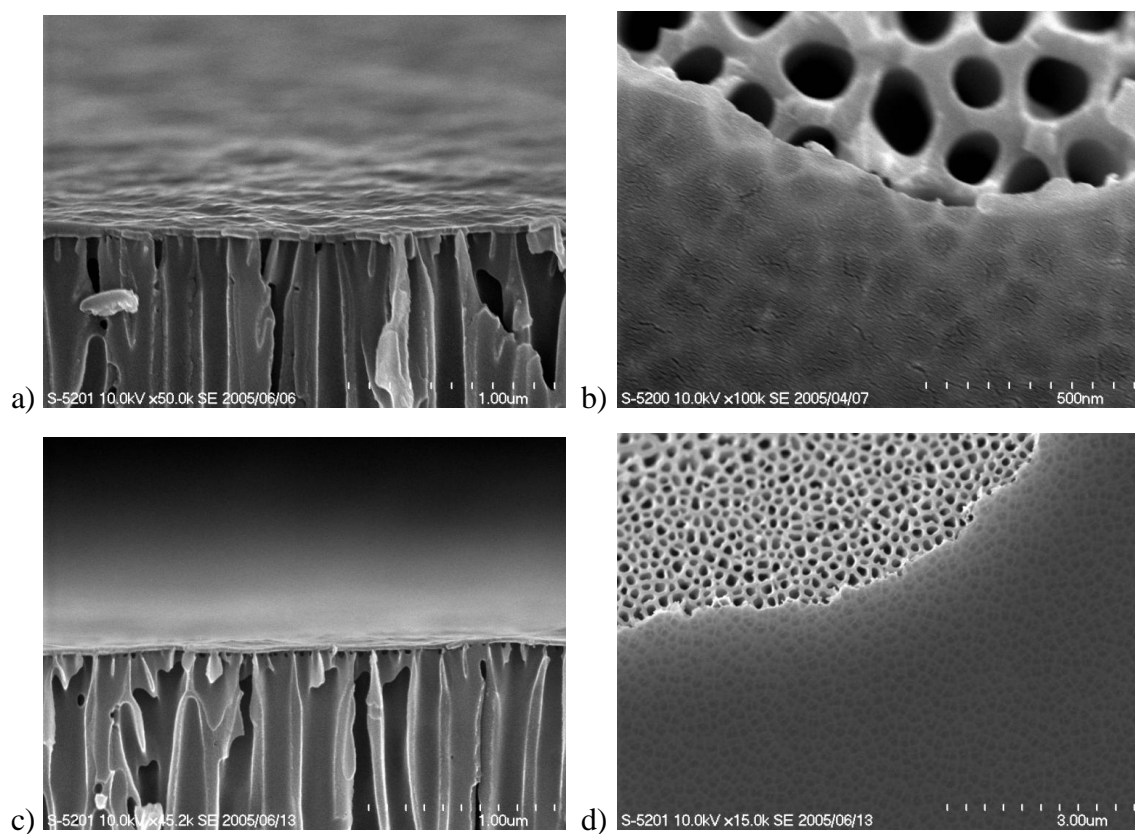

**Figure S2.** Additional SEM pictures of Hybrid\_2 and Hybrid\_3 nanofilms. **a**, SEM side-view image of a Hybrid\_2 nanofilm (42 nm thick) on an ANODISC. **b**, SEM top-view image a Hybrid\_2 nanofilm. **c**, SEM side-view image of a Hybrid\_3 nanofilm (29 nm thick) on porous alumina. **d**, SEM top-view image the Hybrid\_3 nanofilm.

The bulging test was conducted in accordance with the known routine (see references 2, 15 and 41). The tensile stress  $\sigma$  and tensile strain  $\varepsilon$  of ultrathin films can be measured by applying an overpressure to one side of a freely suspended film that covers a metal plate with a circular hole and measuring the resulting deflection of the film. In the present study, the applied pressure was controlled with a digital manometer and the membrane deflection was monitored with an optical microscope. A scheme of the set-up is presented in figure S3.

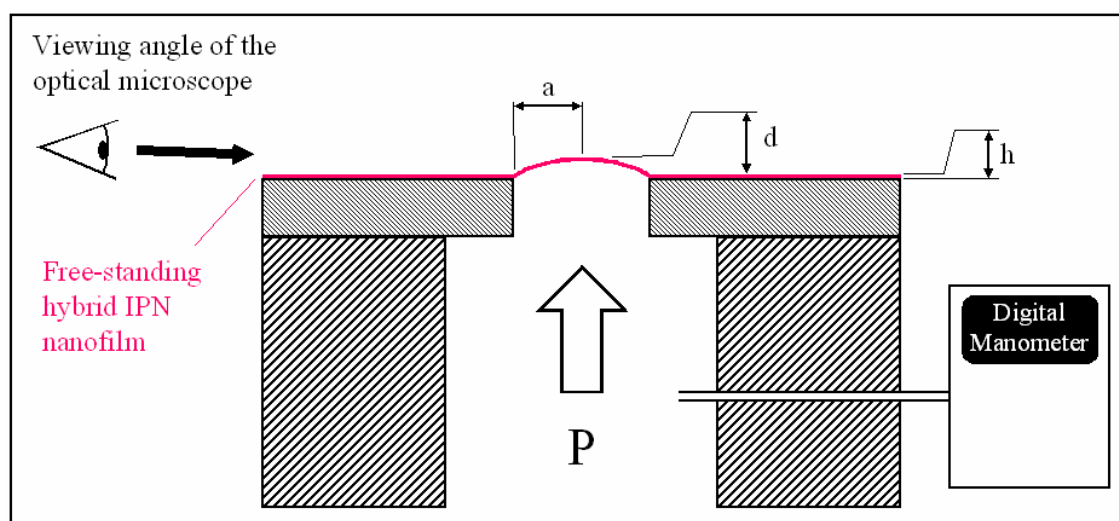

**Figure S3.** Scheme of the bulging experiment. The pressure,  $P$ , vertical displacement of the film centre,  $d$ , radius of the opening,  $a$ , and film thickness,  $h$ , are indicated in the figure.

From such an experiment, it is possible to determine the ultimate tensile stress  $\sigma$  and the ultimate tensile strain  $\varepsilon$  (respectively defined as the strength and elongation at membrane rupture) using the following formulas (explained in Ref. 15):

$$\sigma = (P \times a^2) / (4 \times h \times d)$$

$$\varepsilon = (2 \times d^2) / (3 \times a^2)$$

Where  $P$  is the pressure required to break the membrane,  $a$  is the radius of the opening (0,5 mm in our set-up),  $h$  is the membrane thickness, and  $d$  is the deflection of the membrane centre at rupture. Using this method, the average ultimate mechanical strength  $\sigma$  of the Hybrid\_1 specimen was determined as 105 Mpa (average value from 15 samples). The lowest value is 93 MPa and the highest 136 MPa. The average ultimate elongation  $\epsilon$  is 2,6 %. These results qualitatively agree with those reported in the literature for organic/inorganic hybrid nanofilm (Ref 2 and 15) and clearly demonstrate the robustness of the hybrid IPN nanomembranes.

A detailed analysis of the ultimate mechanical properties of hybrid nanofilms as a function of the composition (organic/inorganic molar ratio) and the organic network crosslinking density is currently under investigation and will be reported elsewhere.
